39. Gao Y, Lv L, Liu S, Ma G, Su Y: Elevated levels of thrombin-generating microparticles in stored red blood cells. *Vox Sang* 2013; 105:11–7
40. Van Der Meijden PE, Van Schilfgaarde M, Van Oerle R, Renné T, ten Cate H, Spronk HM: Platelet- and erythrocyte-derived microparticles trigger thrombin generation via factor XIIa. *J Thromb Haemost* 2012; 10:1355–62
41. Bouchard BA, Orfeo T, Keith HN, Lavoie EM, Gissel M, Fung M, Mann KG: Microparticles formed during storage of red blood cell units support thrombin generation. *J Trauma Acute Care Surg* 2018; 84:598–605
42. de Vroege R, Wildevuur WR, Muradin JA, Graves D, van Oeveren W: Washing of stored red blood cells by an autotransfusion device before transfusion. *Vox Sang* 2007; 92:130–5
43. Bennett-Guerrero E, Kirby BS, Zhu H, Herman AE, Bandarenko N, McMahon TJ: Randomized study of washing 40- to 42-day-stored red blood cells. *Transfusion* 2014; 54:2544–52
44. Refaai MA, Conley GW, Henrichs KF, McRae H, Schmidt AE, Phipps RP, Spinelli SL, Masel D, Cholette JM, Pietropaoli A, Eaton MP, Blumberg N: Decreased hemolysis and improved platelet function in blood components washed with Plasma-Lyte A compared to 0.9% sodium chloride. *Am J Clin Pathol* 2018; 150:146–53
45. Culp-Hill R, Srinivasan AJ, Gehrke S, Kamyszek R, Ansari A, Shah N, Welsby I, D'Alessandro A: Effects of red blood cell (RBC) transfusion on sickle cell disease recipient plasma and RBC metabolism. *Transfusion* 2018; 58:2797–806

## ANESTHESIOLOGY REFLECTIONS FROM THE WOOD LIBRARY-MUSEUM

### Softly Treading *Digitalis's* Timeline, Foxglove Has Fingers in Botany and Medicine

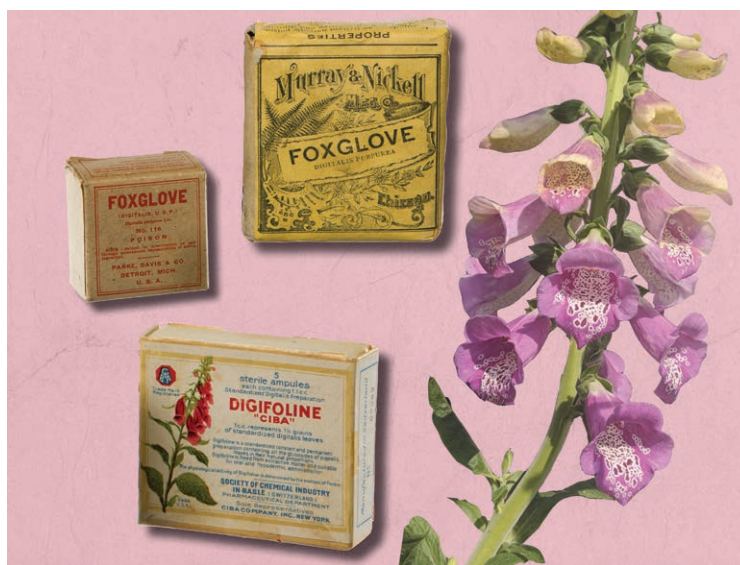

Legend has it that fairies fashioned petals of the Foxglove (*Digitalis purpurea*, right) into slippers to assist foxes in sneak(er)ing through the garden. Though etymologists may disagree on how foxglove came by its name, horticulturalists have long brandished the spiring stalks with vibrant flowers as biennial favorites. Ancient healers and patients appreciated the plant's deadly potential, reflected in nicknames like "Dead Men's Bells" and "Witches' Gloves." Less mysteriously, in 1542, botanist Leonhart Fuchs dubbed the plant *Digitalis*, from the Latin *digitus* for "finger." Not until the end of the nineteenth century were foxglove's medicinal properties formally recognized, and its active components, cardiac glycosides digoxin and digitoxin, isolated. Using memorable names and attractive packaging for the blossoming consumer culture, pharmaceutical companies marketed foxglove by the early 1900s as a staple for treating "dropsy," or heart failure. The American boxes from Parke, Davis & Co. (upper left) and Murray & Nickell (upper middle) date from the 1910s; the one from CIBA (Digifoline, lower left) from the 1930s. (Copyright © the American Society of Anesthesiologists' Wood Library-Museum of Anesthesiology.)

Melissa L. Coleman, M.D., Penn State College of Medicine, Hershey, Pennsylvania, and Jane S. Moon, M.D., University of California, Los Angeles, California.
